# Supplementary material for: Enhancing chimeric antigen receptor T cell therapy by modulating the p53 signaling network with Δ133p53α
Source: PubMed Central journal article supplement — Proc Natl Acad Sci U S A. 2024 Feb 26;121(10):e2317735121. doi: 10.1073/pnas.2317735121 (PMC10927528; doi:10.1073/pnas.2317735121), 2024-02-26
Supplement: pnas.2317735121.sapp.pdf [file pnas.2317735121.sapp.pdf]

## Supporting Information for

### Enhancing chimeric antigen receptor T cell therapy by modulating the p53 signaling network with $\Delta 133p53\alpha$

Christopher Roselle<sup>a,b</sup>, Izumi Horikawa<sup>c</sup>, Linhui Chen<sup>a</sup>, Andre S. Kelly<sup>a</sup>, Donna Gonzales<sup>a</sup>, Tong Da<sup>a</sup>, Nils Wellhausen<sup>a,b</sup>, Philipp C. Rommel<sup>a,d</sup>, Daniel Baker<sup>a,b,e</sup>, Megan Suhoski<sup>a</sup>, John Scholler<sup>a</sup>, Roddy S. O'Connor<sup>a</sup>, Regina M. Young<sup>a</sup>, Curtis C. Harris<sup>c</sup>, and Carl H. June<sup>a,d</sup>

<sup>a</sup>Center for Cellular Immunotherapies, Perelman School of Medicine, University of Pennsylvania, Philadelphia, PA 19104, USA

<sup>b</sup>Perelman School of Medicine, University of Pennsylvania, Philadelphia, PA 19104, USA

<sup>c</sup>Laboratory of Human Carcinogenesis, Center for Cancer Research, National Cancer Institute, National Institutes of Health, Bethesda, MD 20892, USA

<sup>d</sup>Department of Pathology and Laboratory Medicine, Perelman School of Medicine, University of Pennsylvania, Philadelphia, PA 19104, USA

<sup>e</sup>Cardiovascular Institute, Department of Medicine, Perelman School of Medicine, University of Pennsylvania, PA 19104, USA

\*Carl H. June

Email: [cjune@upenn.edu](mailto:cjune@upenn.edu)

#### This PDF file includes:

Figures S1 to S9  
Tables S1 to S2

#### Other supporting materials for this manuscript include the following:

N/A

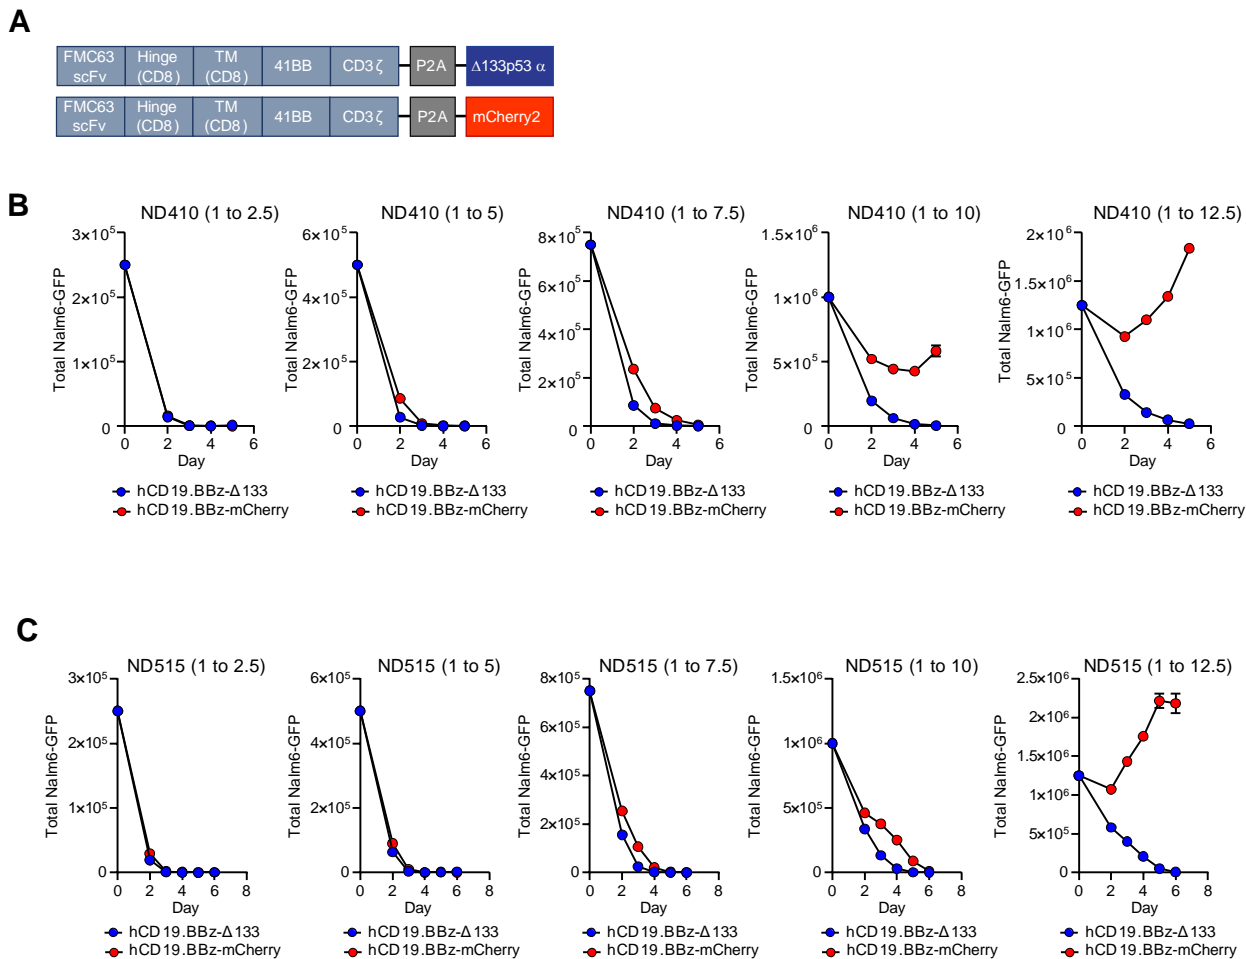

**Fig. S1.** Evaluation of  $\Delta 133$ -CARs expressing  $\Delta 133p53\alpha$  downstream of P2A linker. (A) Construct maps of  $\Delta 133p53\alpha$ - and mCherry2-expressing constructs with hCD19.BBz CAR upstream of P2A linker. (B) Tumor measurements over time from in vitro co-culture assay described in Figure 1D using CARs generated from healthy donor ND410. (C) Tumor measurements over time from in vitro co-culture assay described in Figure 1D using CARs generated from healthy donor ND410. Note that aside from the data presented in this figure, all other data in this manuscript was generated using CAR constructs with the CD19-directed CAR downstream of the P2A linker.

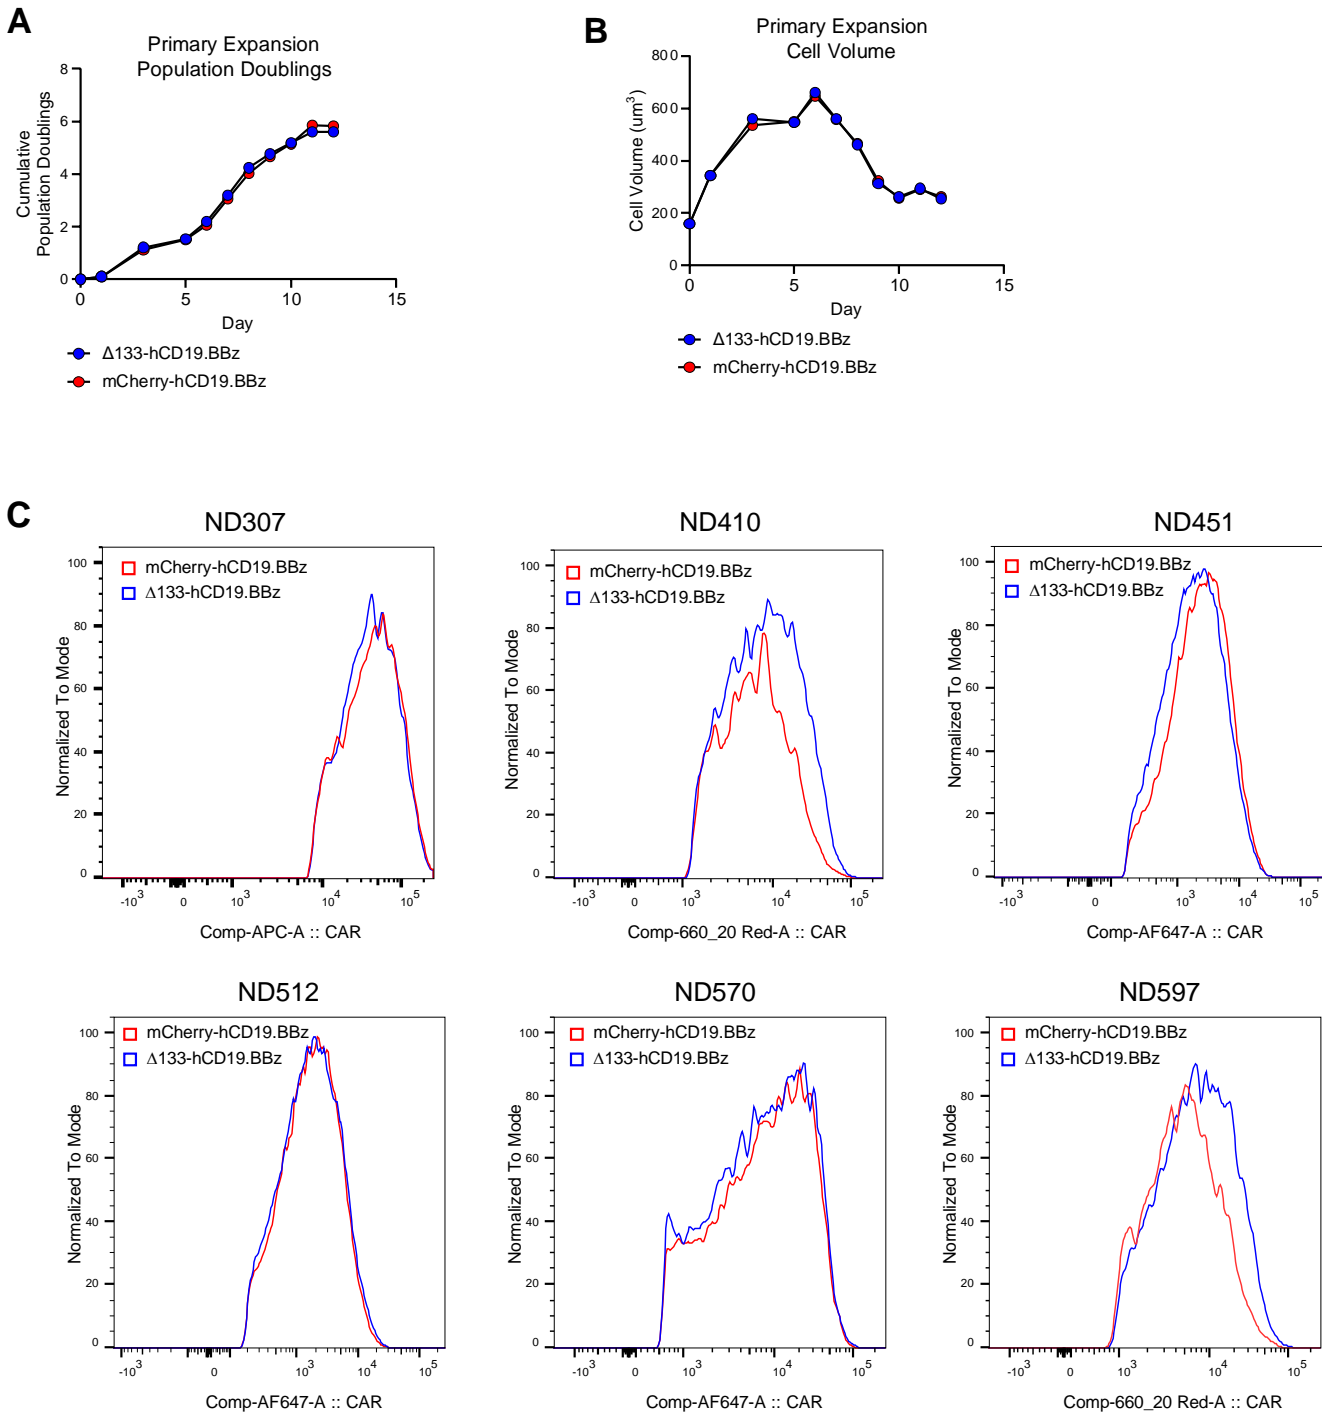

**Fig. S2.** Characterization of  $\Delta$ 133-CARs during primary expansion. (A) Representative proliferation curves of total T cells during primary expansion and (B) cell volume for  $\Delta$ 133- and WT CARs. No meaningful or consistent differences were observed during primary expansion with respect to proliferation or cell volume. (C) Surface CAR median fluorescence intensity (MFI) at the end of primary expansion for the six normal donors used in Figure 1E and 1F, as indicated by the header above each graph (i.e. “ND307”). Histograms shown were gated as follows: lymphocytes/single cells/live/CAR+.

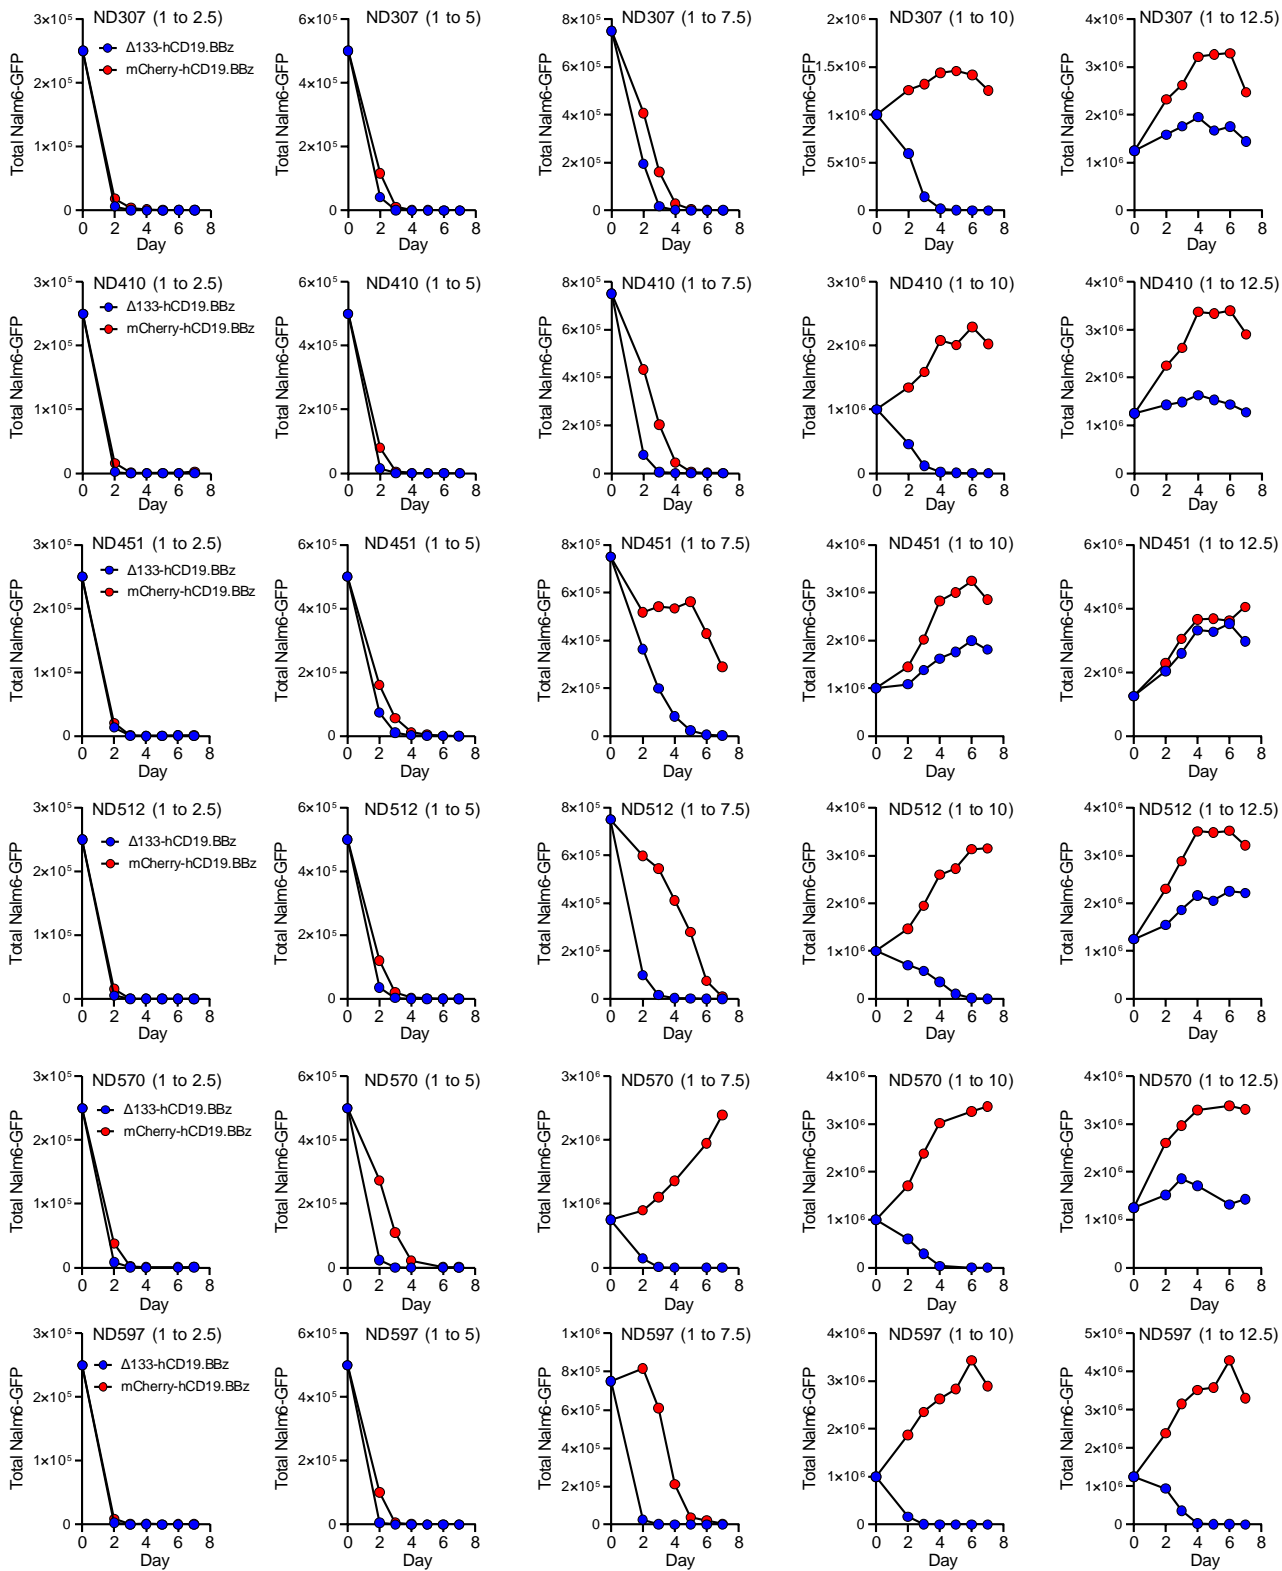

**Fig. S3.** Donor-specific tumor clearance curves for in vitro Nalm6 co-culture data shown in Figure 1E. Each row represents a different normal donor, indicated by the header above each graph. Each column represents a different E:T ratio, showing all five E:Ts that were evaluated: 1 to 2.5, 1 to 5, 1 to 7.5, 1 to 10, and 1 to 12.5. Each point represents the mean of two technical replicates. Error bars are not visible due to the size of each data point exceeding the range of the SEM.

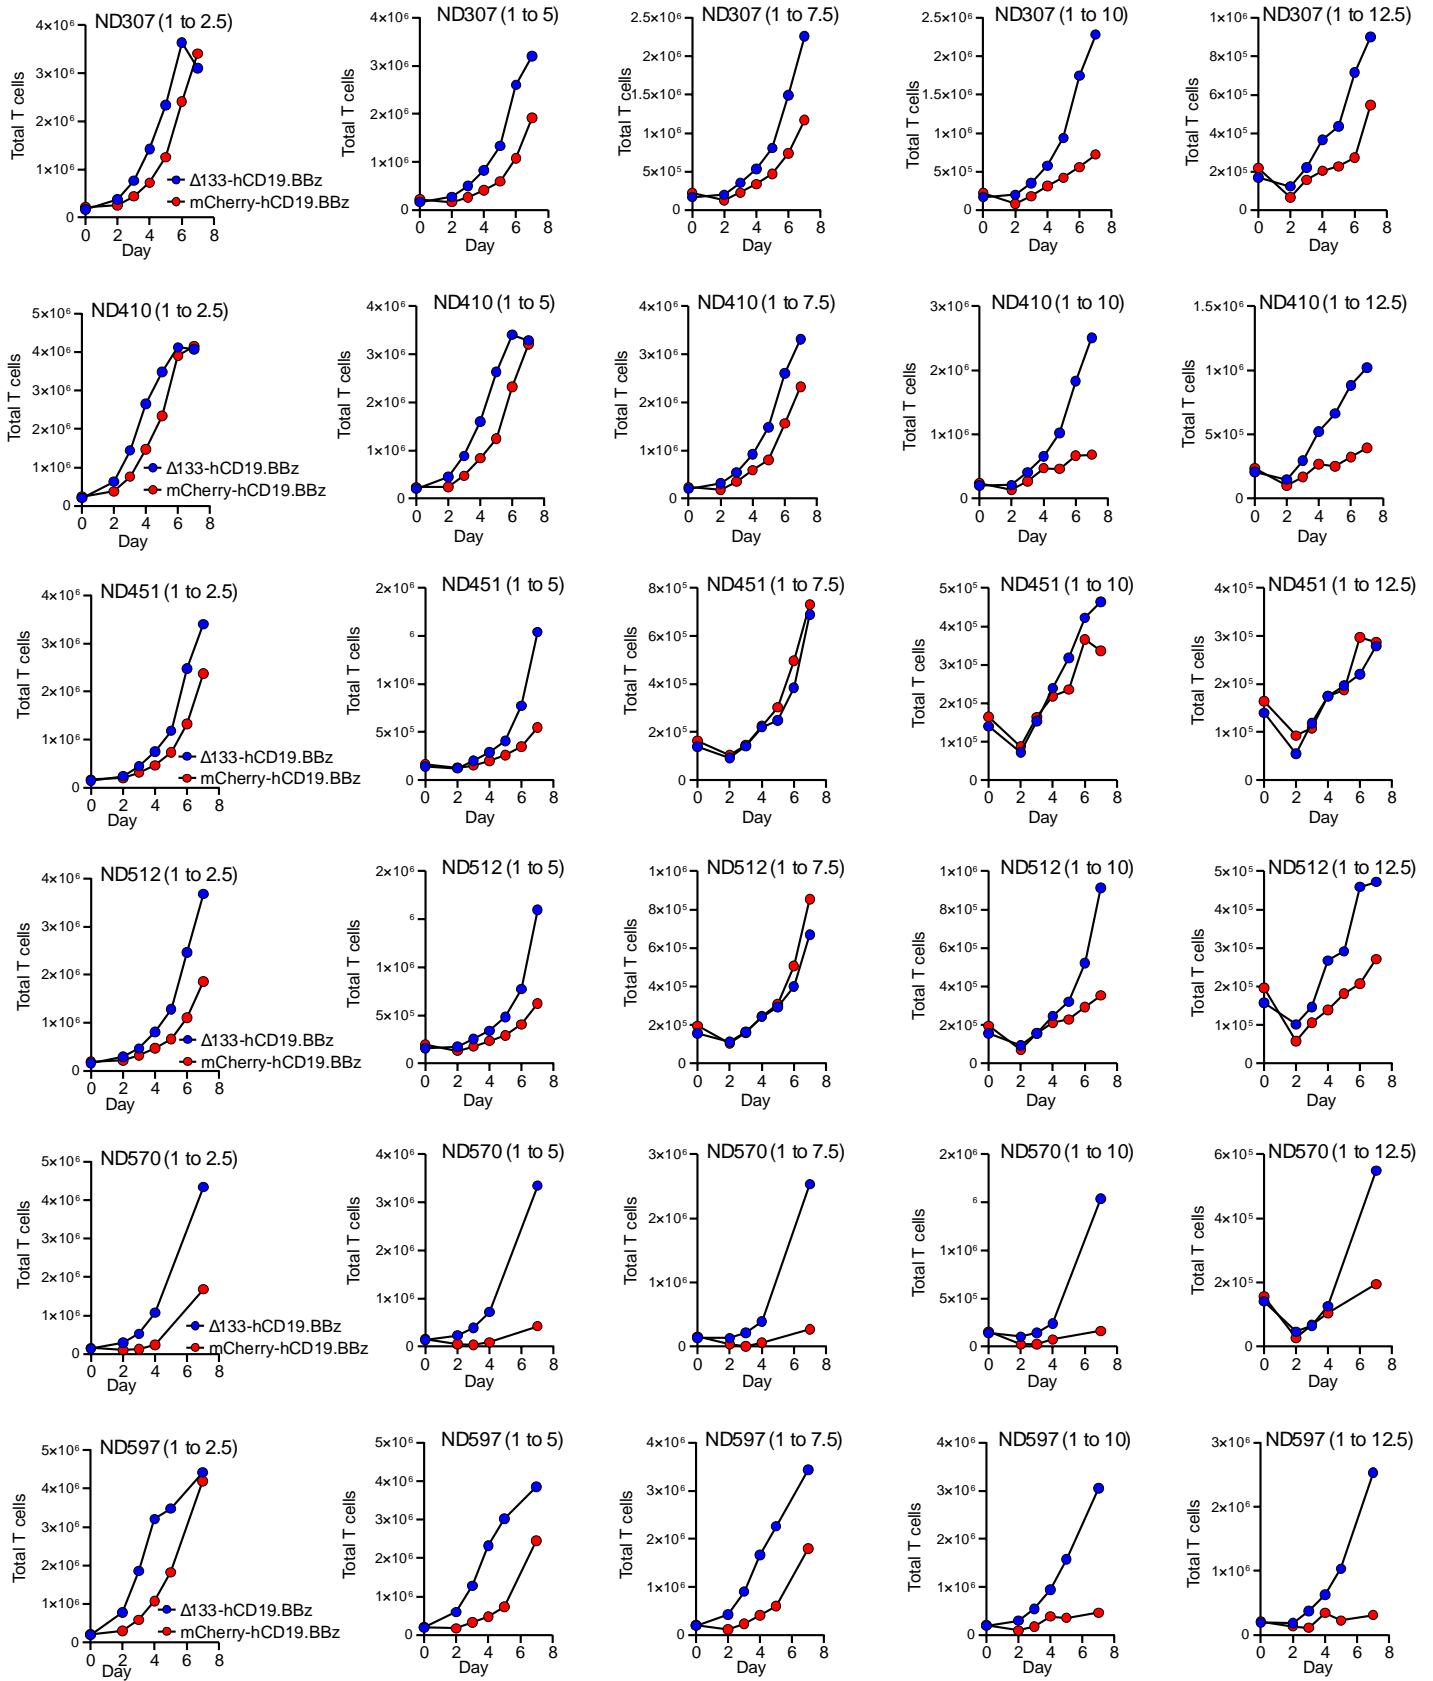

**Fig. S4.** Donor-specific proliferation curves from in vitro Nalm6 co-culture data shown in Figure 1F. Each row represents a different normal donor, indicated by the header above each graph. Each column represents a different E:T ratio, showing all five E:Ts that were evaluated: 1 to 2.5, 1 to 5, 1 to 7.5, 1 to 10, and 1 to 12.5. Each point represents the mean of two technical replicates. Error bars are not visible due to the size of each data point exceeding the range of the SEM.

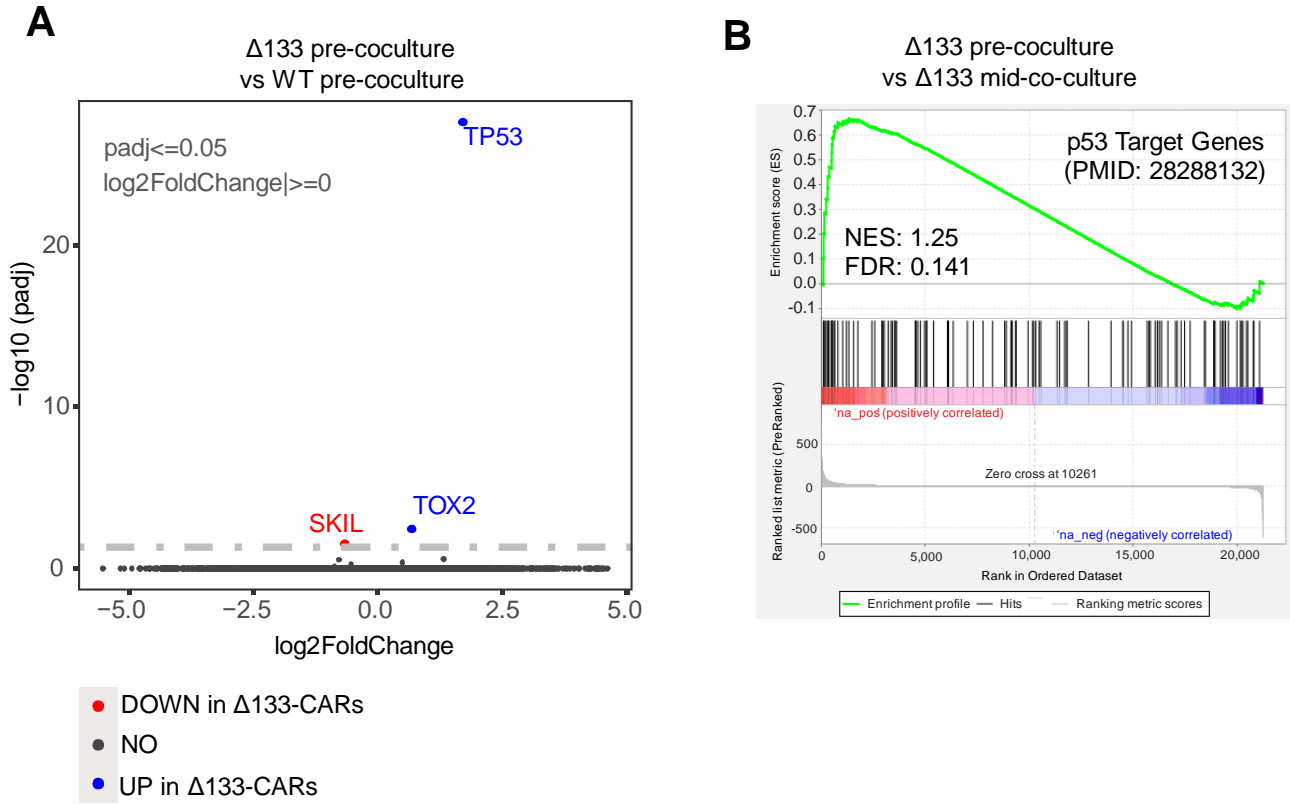

**Fig. S5.** RNAseq data for additional pairwise comparisons. (A) Volcano plot showing differentially expressed genes in WT and  $\Delta 133$ p53 $\alpha$ -expressing CAR T cells isolated prior to co-culture. All genes with an adjusted p-value (padj) less than or equal to 0.05 are highlighted, with genes in red upregulated in the WT CARs (i.e. downregulated in  $\Delta 133$ -CARs) and gene in blue upregulated in  $\Delta 133$ -CARs. Note that TP53 is reflective of ectopic  $\Delta 133$ p53 $\alpha$  expression. (B) Gene set enrichment analysis (GSEA) results for p53 Target Genes. Compared with  $\Delta 133$ -CARs pre-coculture,  $\Delta 133$ -CARs mid-coculture have an enrichment in expression of p53 target genes.

### A ND307 hCD19.28z - 3x28 Bead Restimulation

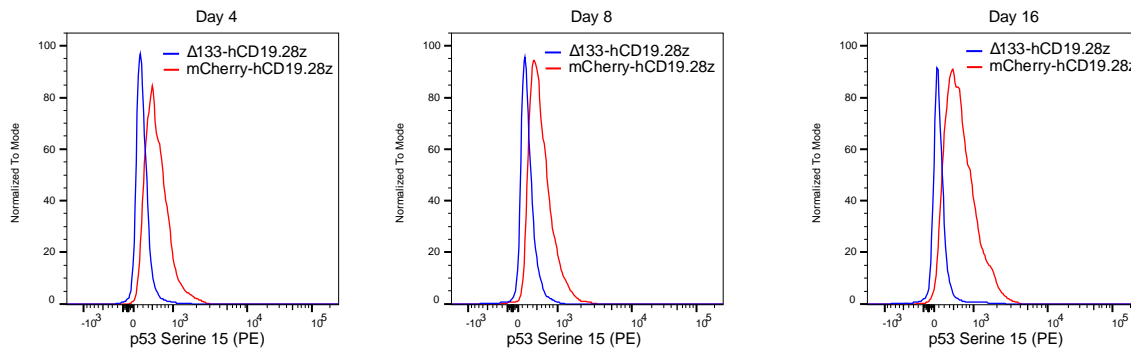

### B ND569 hCD19.BBz - Nalm6 co-culture

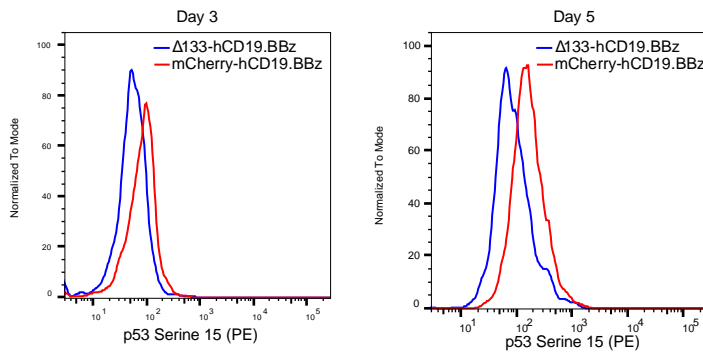

### C ND569 hCD19.BBz - 3x28 Bead Restimulation

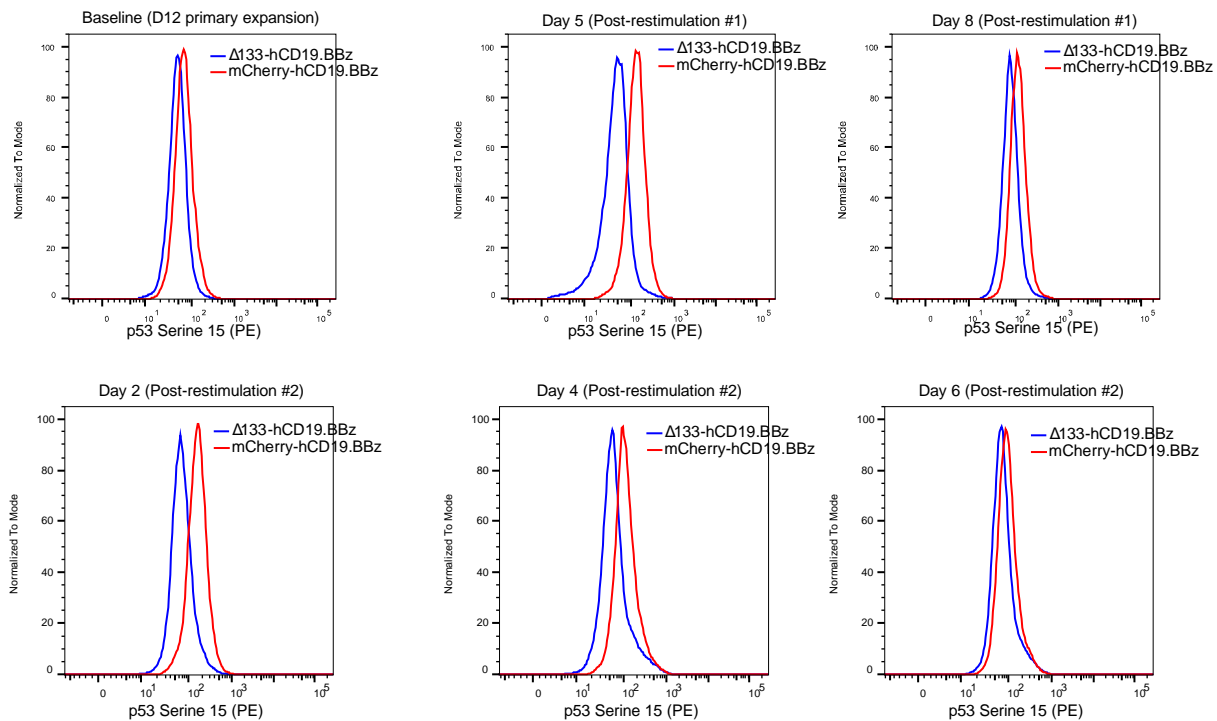

**Fig. S6.**  $\Delta 133$ -CARs have reduced phospho-p53 (serine 15) expression in multiple contexts. (A)  $\Delta 133$ -CARs with a CD28 costimulatory domain have markedly reduced expression of p53-S15 when restimulated post-expansion with magnetic beads coated with anti-CD3 and anti-CD28 antibodies. (B)  $\Delta 133$ -CARs with a 41BB costimulatory domain exhibit reduced p53-S15 expression when co-cultured with Nalm6-GFP leukemia cells and (C) when restimulated post-expansion with with magnetic beads coated with anti-CD3 and anti-CD28 antibodies. For each context in A-C, multiple time points are shown, as indicated by the header above each histogram.

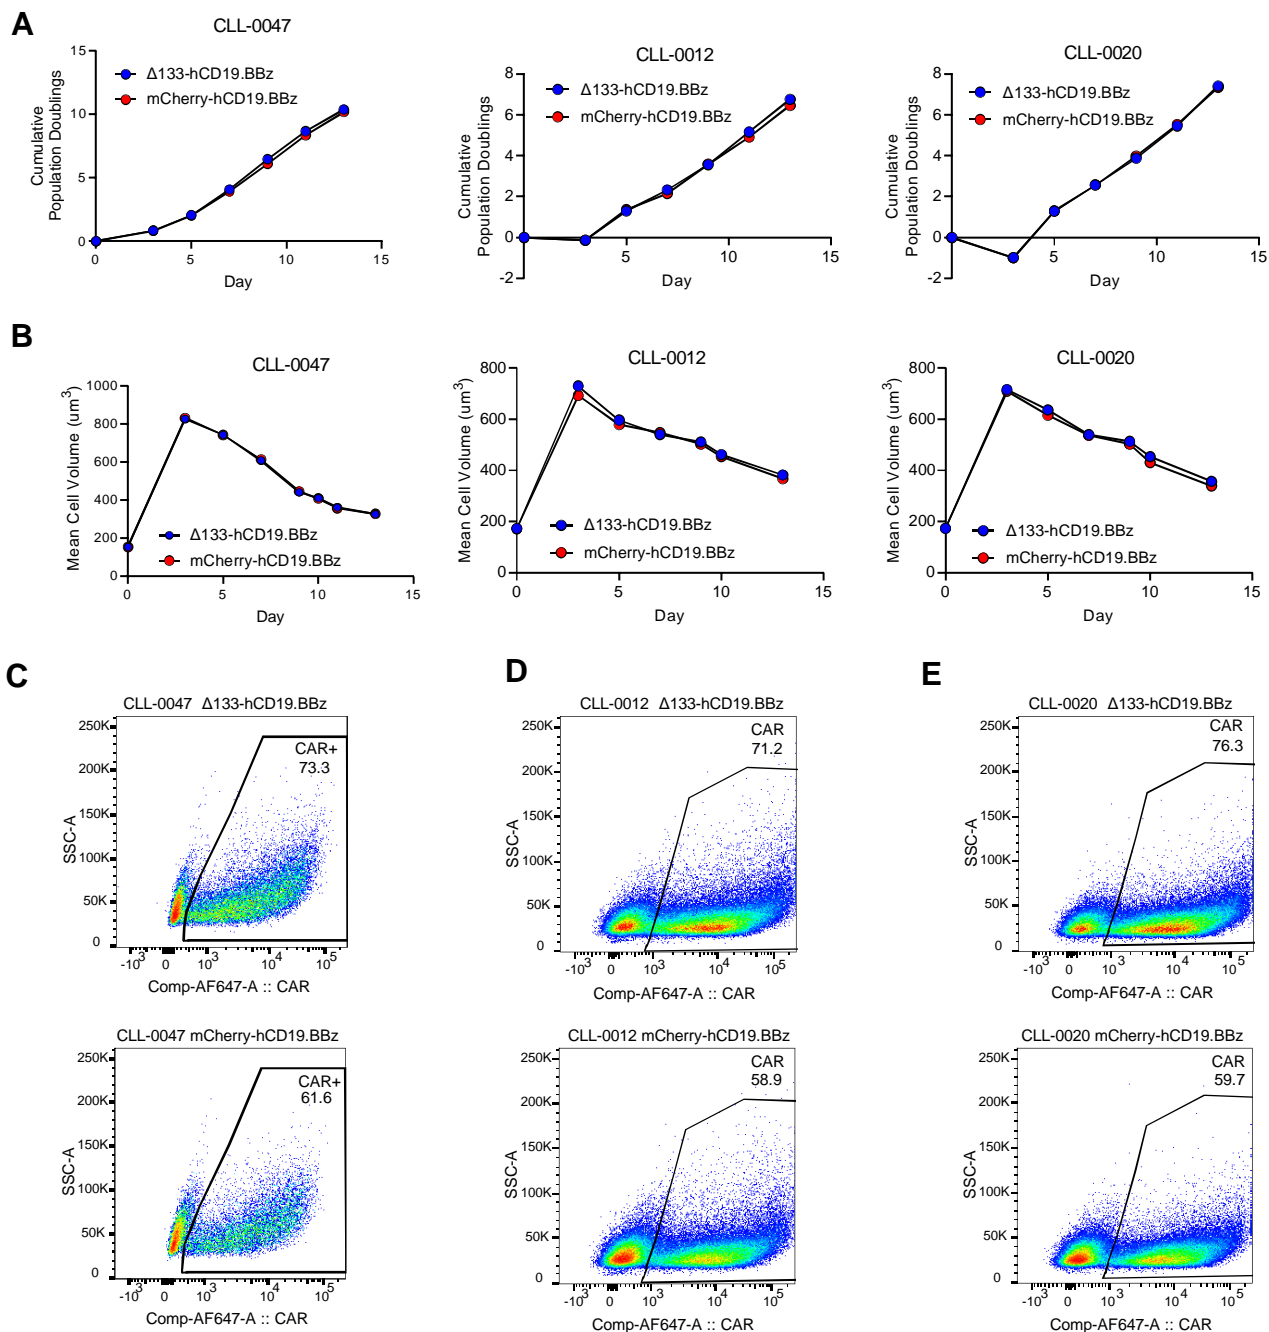

**Fig. S7.** Primary expansion characteristics of CLL-derived CAR T cells. (A) T cell proliferation during primary expansion for responding patient #0047 and non-responding patients #0012 and #0020. (B) Corresponding cell volumes during primary expansion at each time point for data shown in A. (C) Surface CAR expression demonstrates similar transduction efficiencies post-expansion for patient #0047.  $\Delta$ 133-CARs are shown in the top panel, with corresponding WT mCherry-expressing CARs in the bottom panel. The same is shown for patient #0012 in (D) and patient #0020 in (E).



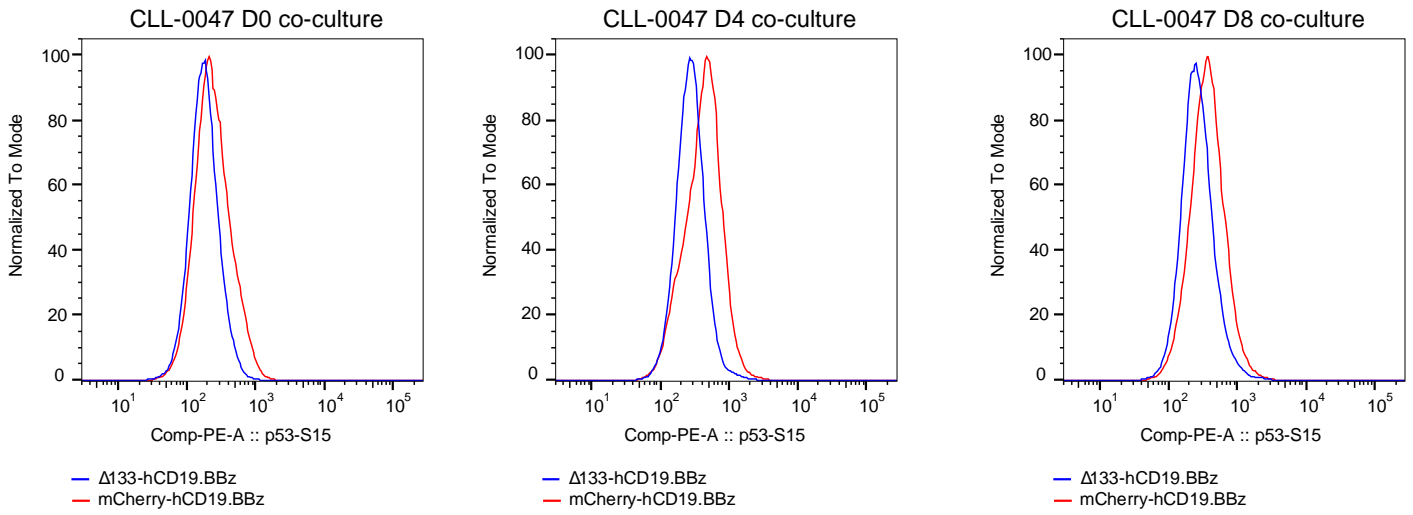

**Fig. S8.**  $\Delta 133$ -CARs generated from CLL patient #0047 have reduced p53-S15 expression during in vitro Nalm6-GFP co-culture.

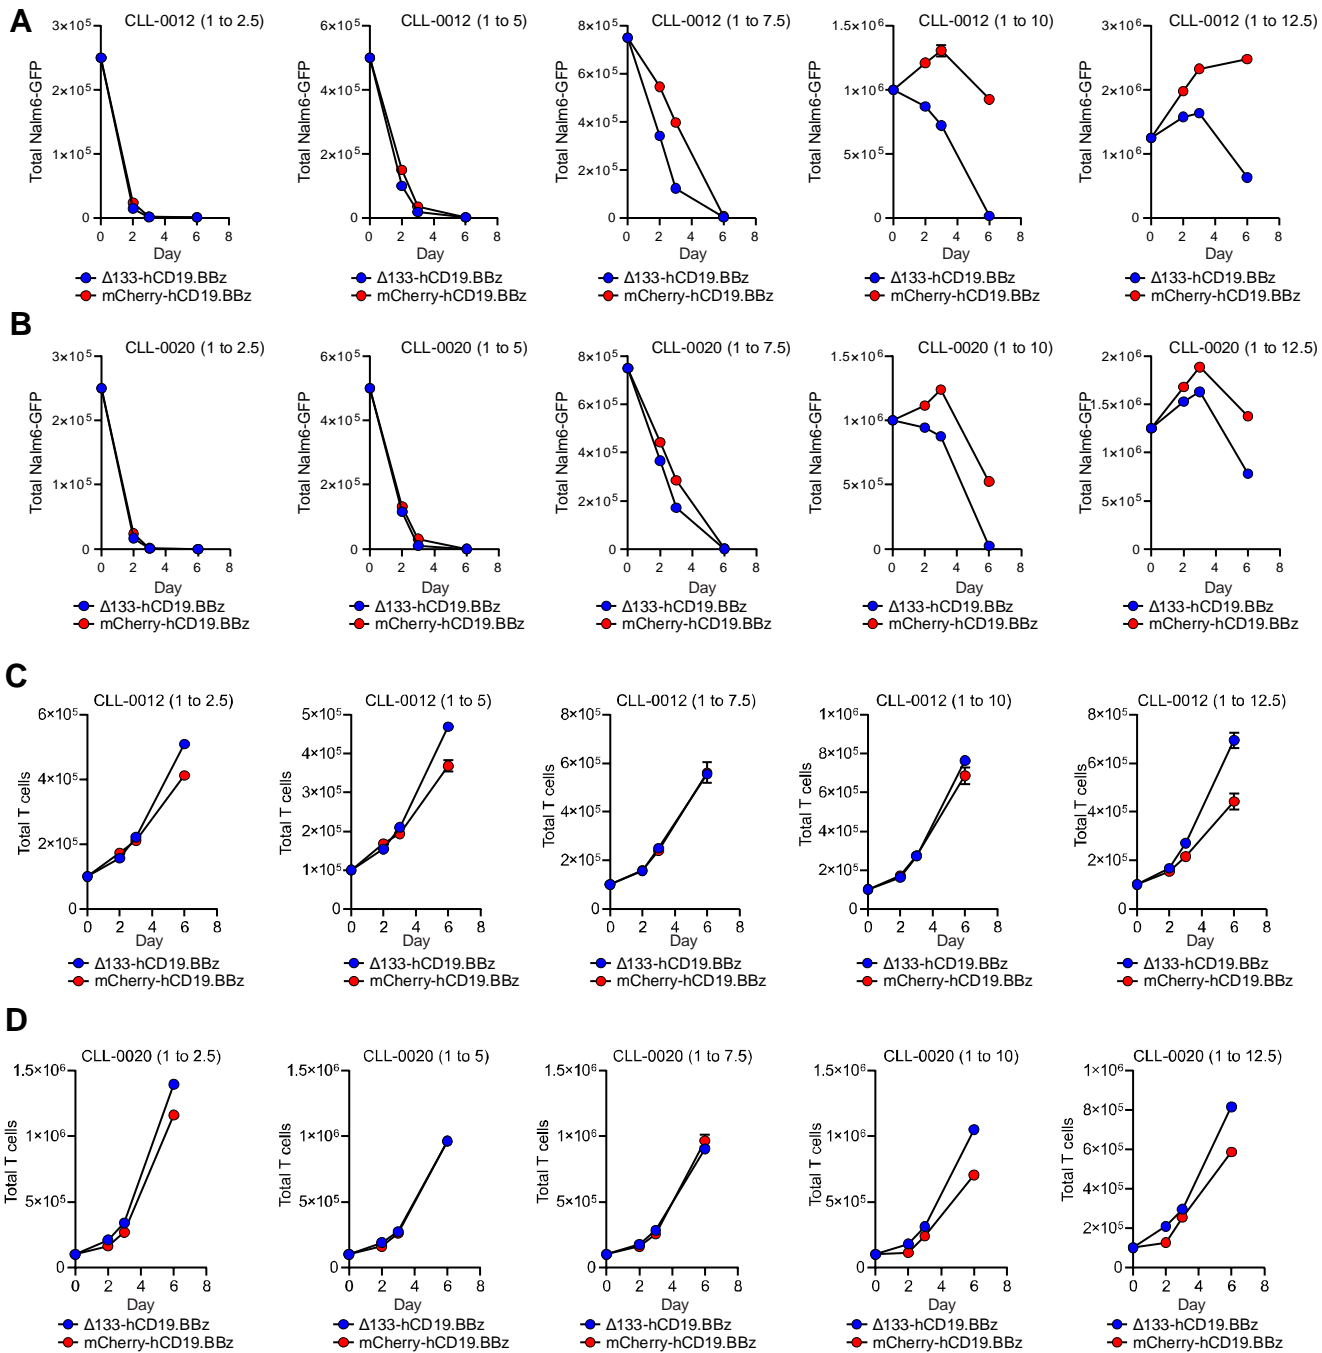

**Fig. S9.** Patient-specific tumor clearance and T cell proliferation curves during in vitro Nalm6-GFP co-culture. In (A) and (B) are the individual tumor clearance curves for the aggregated data shown in Figure 4C for patients #0012 and #0020, respectively, as indicated by the header above each graph. In (C) and (D) are the corresponding T cell proliferation curves for patients #0012 and #0020, respectively, again indicated by the header above each graph.

**Table S1.** Top 100 differentially expressed genes with p-adjusted  $\leq 0.05$  sorted by the magnitude of log2 fold change.

| Rank | ID               | Gene.name  | Up/Down | log2FoldChange | padj     |
|------|------------------|------------|---------|----------------|----------|
| 1    | ENSG0000016845 3 | HR         | DOWN    | -3.65          | 1.69E-10 |
| 2    | ENSG0000020486 6 | IGFL2      | DOWN    | -3.62          | 9.81E-04 |
| 3    | ENSG0000022201 2 | AC005481.1 | DOWN    | -3.37          | 2.48E-03 |
| 4    | ENSG0000028096 9 | RPS4Y2     | DOWN    | -3.22          | 2.46E-03 |
| 5    | ENSG0000026038 6 | LINC0122 5 | DOWN    | -3.11          | 2.23E-04 |
| 6    | ENSG0000020496 0 | BLACE      | DOWN    | -2.78          | 8.54E-04 |
| 7    | ENSG0000009986 4 | PALM       | DOWN    | -2.56          | 3.17E-15 |
| 8    | ENSG0000001541 3 | DPEP1      | DOWN    | -2.56          | 1.69E-10 |
| 9    | ENSG0000022941 7 | NPM1P2 5   | DOWN    | -2.54          | 1.04E-02 |
| 10   | ENSG0000009986 6 | MADCAM1    | DOWN    | -2.46          | 1.04E-02 |
| 11   | ENSG0000012732 4 | TSPAN8     | DOWN    | -2.45          | 1.73E-05 |
| 12   | ENSG0000024521 3 | AC105285.1 | DOWN    | -2.44          | 3.44E-03 |
| 13   | ENSG0000014519 8 | VWA5B 2    | DOWN    | -2.33          | 1.79E-02 |
| 14   | ENSG0000006981 2 | HES2       | DOWN    | -2.28          | 9.10E-03 |
| 15   | ENSG0000025710 8 | NHLRC4     | DOWN    | -2.25          | 3.74E-02 |
| 16   | ENSG0000017322 7 | SYT12      | DOWN    | -2.23          | 2.52E-04 |
| 17   | ENSG0000018363 8 | RP11 1     | DOWN    | -2.23          | 2.23E-04 |
| 18   | ENSG0000010133 1 | CCM2L      | DOWN    | -2.23          | 4.63E-02 |
| 19   | ENSG0000010119 8 | NKAIN4     | DOWN    | -2.21          | 2.15E-09 |
| 20   | ENSG0000015189 2 | GFRA1      | DOWN    | -2.18          | 1.38E-06 |
| 21   | ENSG0000016924 2 | EFNA1      | DOWN    | -2.17          | 8.55E-03 |
| 22   | ENSG0000023562 1 | LINC0049 4 | DOWN    | -2.15          | 4.81E-02 |
| 23   | ENSG0000027902 4 | AC112255.1 | DOWN    | -2.12          | 2.79E-02 |
| 24   | ENSG0000010547 2 | CLEC11A    | DOWN    | -2.10          | 9.19E-11 |
| 25   | ENSG0000017688 4 | GRIN1      | DOWN    | -2.08          | 6.25E-04 |
| 26   | ENSG0000018573 7 | NRG3       | DOWN    | -2.08          | 3.80E-03 |
| 27   | ENSG0000018502 8 | LRRC14 B   | DOWN    | -2.08          | 4.87E-07 |
| 28   | ENSG0000021435 7 | NEURL1 B   | DOWN    | -2.07          | 2.44E-09 |
| 29   | ENSG0000009237 7 | TBL1Y      | DOWN    | -2.05          | 1.33E-05 |
| 30   | ENSG0000022685 9 | LINC0205 1 | DOWN    | -2.04          | 2.39E-03 |
| 31   | ENSG0000017083 5 | CEL        | DOWN    | -2.03          | 2.87E-03 |
| 32   | ENSG0000017643 5 | CLEC14 A   | DOWN    | -2.00          | 1.61E-07 |
| 33   | ENSG0000023588 8 | AF064858.1 | DOWN    | -1.98          | 4.62E-05 |
| 34   | ENSG0000026115 9 | AC112484.3 | DOWN    | -1.97          | 3.13E-08 |
| 35   | ENSG0000025431 9 | AC246817.2 | DOWN    | -1.95          | 1.20E-03 |
| 36   | ENSG0000023141 9 | LINC0068 9 | DOWN    | -1.93          | 2.77E-03 |
| 37   | ENSG0000016259 1 | MEGF6      | DOWN    | -1.93          | 9.60E-03 |
| 38   | ENSG0000026366 7 | AL035696.3 | DOWN    | -1.88          | 9.37E-04 |
| 39   | ENSG0000010855 1 | RASD1      | DOWN    | -1.88          | 6.36E-06 |
| 40   | ENSG0000016436 2 | TERT       | DOWN    | -1.87          | 1.02E-04 |
| 41   | ENSG0000017220 1 | ID4        | DOWN    | -1.86          | 4.11E-07 |
| 42   | ENSG0000004060 8 | RTN4R      | DOWN    | -1.84          | 1.46E-04 |
| 43   | ENSG0000022401 6 | AC092681.1 | DOWN    | -1.83          | 3.15E-02 |
| 44   | ENSG0000019842 9 | ZNF69      | DOWN    | -1.82          | 2.99E-02 |
| 45   | ENSG0000020597 8 | NYNRIN     | DOWN    | -1.80          | 3.37E-06 |
| 46   | ENSG0000010002 7 | YPEL1      | DOWN    | -1.79          | 2.46E-04 |
| 47   | ENSG0000025727 5 | AL139020.1 | DOWN    | -1.79          | 2.13E-03 |
| 48   | ENSG0000016581 0 | BTNL9      | DOWN    | -1.79          | 2.69E-02 |
| 49   | ENSG0000013063 5 | COL5A1     | DOWN    | -1.78          | 2.65E-18 |
| 50   | ENSG0000018086 1 | LINC0155 9 | DOWN    | -1.76          | 1.04E-03 |

| Rank | ID                      | Gene.name       | Up/Down   | log2FoldChange | padj            |
|------|-------------------------|-----------------|-----------|----------------|-----------------|
| 51   | ENSG0000013020 2        | NECTIN2         | DOWN      | -1.75          | 7.31E-03        |
| 52   | ENSG0000000480 9        | SLC22A1 6       | DOWN      | -1.75          | 3.03E-02        |
| 53   | ENSG0000010293 5        | ZNF42 3         | DOWN      | -1.75          | 2.46E-02        |
| 54   | ENSG0000022494 0        | PRRT4           | DOWN      | -1.74          | 2.50E-03        |
| 55   | ENSG0000016769 3        | NXN             | DOWN      | -1.73          | 1.61E-07        |
| 56   | ENSG0000026706 0        | PTGES3L         | DOWN      | -1.73          | 3.65E-04        |
| 57   | ENSG0000026143 4        | AC021087.4      | DOWN      | -1.73          | 7.70E-03        |
| 58   | ENSG0000016689 7        | ELFN2           | DOWN      | -1.72          | 6.71E-09        |
| 59   | ENSG0000017653 3        | GNG7            | DOWN      | -1.72          | 9.78E-12        |
| 60   | ENSG0000017528 7        | PHYHD1          | DOWN      | -1.70          | 8.05E-06        |
| 61   | ENSG0000000274 5        | WNT16           | DOWN      | -1.67          | 2.28E-03        |
| 62   | ENSG0000018217 5        | RGMA            | DOWN      | -1.67          | 2.07E-02        |
| 63   | ENSG0000027273 3        | AP000345.2      | DOWN      | -1.67          | 4.07E-06        |
| 64   | ENSG0000009593 2        | SMIM2 4         | DOWN      | -1.66          | 4.59E-06        |
| 65   | ENSG0000006571 7        | TLE2            | DOWN      | -1.65          | 7.92E-04        |
| 66   | ENSG0000003586 2        | TIMP2           | DOWN      | -1.65          | 1.01E-15        |
| 67   | ENSG0000017299 5        | ARPP21          | DOWN      | -1.64          | 5.80E-10        |
| 68   | ENSG0000022597 8        | HAR1A           | DOWN      | -1.63          | 4.78E-04        |
| 69   | ENSG0000011255 9        | MDFI            | DOWN      | -1.63          | 7.70E-09        |
| 70   | ENSG0000026792 4        | AC139769.2      | DOWN      | -1.62          | 6.36E-06        |
| 71   | ENSG0000026773 1        | AC005332.3      | DOWN      | -1.61          | 2.60E-04        |
| 72   | ENSG0000018470 2        | SEPTIN5         | DOWN      | -1.61          | 1.82E-04        |
| 73   | ENSG0000000653 4        | ALDH3B1         | DOWN      | -1.61          | 4.25E-03        |
| 74   | ENSG0000013511 6        | HRK             | DOWN      | -1.61          | 2.50E-03        |
| 75   | ENSG0000017480 7        | CD248           | DOWN      | -1.60          | 8.42E-06        |
| 76   | ENSG0000018762 1        | TCL6            | DOWN      | -1.60          | 4.25E-03        |
| 77   | <b>ENSG0000017769 4</b> | <b>NAALADL2</b> | <b>UP</b> | <b>1.59</b>    | <b>2.71E-02</b> |
| 78   | ENSG0000016891 6        | ZNF60 8         | DOWN      | -1.59          | 8.74E-11        |
| 79   | ENSG0000016799 2        | VWCE            | DOWN      | -1.57          | 1.74E-04        |
| 80   | ENSG0000017667 8        | FOXL1           | DOWN      | -1.57          | 2.83E-07        |
| 81   | ENSG0000006760 6        | PRKCZ           | DOWN      | -1.57          | 8.73E-05        |
| 82   | ENSG0000019678 1        | TLE1            | DOWN      | -1.56          | 2.67E-03        |
| 83   | ENSG0000018933 7        | KAZN            | DOWN      | -1.56          | 1.60E-05        |
| 84   | ENSG0000022513 8        | SLC9A3-AS1      | DOWN      | -1.56          | 3.35E-02        |
| 85   | ENSG0000016273 8        | VANGL2          | DOWN      | -1.55          | 9.08E-04        |
| 86   | ENSG0000010096 8        | NFATC4          | DOWN      | -1.55          | 4.28E-06        |
| 87   | ENSG0000017105 6        | SOX7            | DOWN      | -1.54          | 1.37E-05        |
| 88   | ENSG0000018077 7        | ANKRD30 B       | DOWN      | -1.54          | 6.25E-04        |
| 89   | ENSG0000016067 8        | S100A1          | DOWN      | -1.54          | 1.63E-02        |
| 90   | ENSG0000009988 9        | ARVCF           | DOWN      | -1.53          | 2.23E-03        |
| 91   | ENSG0000008707 6        | HSD17B1 4       | DOWN      | -1.53          | 6.40E-03        |
| 92   | ENSG0000024195 6        | AC109466.1      | DOWN      | -1.52          | 3.13E-05        |
| 93   | ENSG0000021197 8        | IGHV5-7 8       | DOWN      | -1.52          | 4.89E-07        |
| 94   | ENSG0000022705 1        | C14orf13 2      | DOWN      | -1.52          | 2.08E-06        |
| 95   | ENSG0000000439 9        | PLXND1          | DOWN      | -1.51          | 1.69E-10        |
| 96   | ENSG0000010840 5        | P2RX1           | DOWN      | -1.51          | 1.83E-03        |
| 97   | ENSG0000015798 5        | AGAP1           | DOWN      | -1.51          | 1.00E-06        |
| 98   | ENSG0000013165 0        | KREMEN2         | DOWN      | -1.51          | 1.68E-03        |
| 99   | ENSG0000023812 1        | LINC0042 6      | DOWN      | -1.50          | 3.49E-05        |
| 100  | ENSG0000016957 5        | VPREB1          | DOWN      | -1.49          | 1.49E-05        |

**Table S2.** Gene sets enriched in  $\Delta$ 133-CARs and WT CARs with False discovery rate (FDR) < 0.1

| Gene Set                                                                                   | NES   | NOM p-val I | FDR q-val |
|--------------------------------------------------------------------------------------------|-------|-------------|-----------|
| GOBP_RIBOSOME_BIOGENESIS                                                                   | 2.08  | 0           | 0         |
| HALLMARK_MYC_TARGETS_V2                                                                    | 2.07  | 0           | 0         |
| GOBP_RNA_MODIFICATION                                                                      | 2.01  | 0           | 0         |
| GOBP_RRNA_PROCESSING                                                                       | 1.99  | 0           | 0         |
| HALLMARK_MYC_TARGETS_V1                                                                    | 1.99  | 0           | 0         |
| GOBP_CELLULAR_RESPONSE_TO_HEAT                                                             | 1.95  | 0           | 0         |
| GOBP_REGULATION_OF_TELOMERE_MAINTENANCE                                                    | 1.93  | 0           | 0         |
| GOBP_RNA_SPLICING_VIA_TRANSESTERIFICATION_REACTIONS                                        | 1.91  | 0           | 0         |
| GOBP_POSITIVE_REGULATION_OF_TELOMERE_MAINTENANCE                                           | 1.88  | 0           | 0.001     |
| GOBP_TRNA_MODIFICATION                                                                     | 1.87  | 0           | 0.001     |
| GOBP_POSITIVE_REGULATION_OF_TRANSCRIPTION_BY_RNA_POLYMERASE_I                              | 1.86  | 0           | 0.001     |
| GOBP_MITOCHONDRIAL_GENE_EXPRESSION                                                         | 1.86  | 0           | 0.001     |
| GOBP_TRNA_PROCESSING                                                                       | 1.85  | 0           | 0.001     |
| GOBP_RNA_METHYLATION                                                                       | 1.85  | 0           | 0.001     |
| GOBP_RRNA_METABOLIC_PROCESS                                                                | 1.83  | 0           | 0.002     |
| GOBP_MITOCHONDRIAL_TRANSLATION                                                             | 1.82  | 0           | 0.003     |
| GOBP_REGULATION_OF_MRNA_PROCESSING                                                         | 1.81  | 0           | 0.003     |
| GOBP_POSITIVE_REGULATION_OF_CHROMOSOME_ORGANIZATION                                        | 1.81  | 0           | 0.003     |
| GOBP_POSITIVE_REGULATION_OF_DNA_BIOSYNTHETIC_PROCESS                                       | 1.8   | 0           | 0.004     |
| GOBP_TRANSCRIPTION_BY_RNA_POLYMERASE_III                                                   | 1.79  | 0           | 0.004     |
| GOBP_REGULATION_OF_TRANSCRIPTION_BY_RNA_POLYMERASE_III                                     | 1.78  | 0           | 0.005     |
| GOBP_MITOCHONDRIAL_RNA_METABOLIC_PROCESS                                                   | 1.75  | 0           | 0.011     |
| GOBP_REGULATION_OF_HETEROTYPIC_CELL_CELL_ADHESION                                          | 1.74  | 0           | 0.016     |
| GOBP_REGULATION_OF_TRANSLATIONAL_INITIATION                                                | 1.74  | 0.005       | 0.015     |
| GOBP_MATURATION_OF_5_8S_RRNA                                                               | 1.74  | 0.007       | 0.015     |
| GOBP_REGULATION_OF_RNA_SPLICING                                                            | 1.73  | 0           | 0.016     |
| GOBP_RRNA_MODIFICATION                                                                     | 1.73  | 0           | 0.015     |
| GOBP_TRANSLATIONAL_INITIATION                                                              | 1.73  | 0           | 0.015     |
| GOBP_REGULATION_OF_TELOMERE_MAINTENANCE_VIA_TELOMERE_LENGTHENING                           | 1.73  | 0.003       | 0.016     |
| GOBP_TYROSINE_PHOSPHORYLATION_OF_STAT_PROTEIN                                              | 1.72  | 0           | 0.017     |
| GOBP_LYMPHOCYTE_CHEMOTAXIS                                                                 | 1.72  | 0           | 0.016     |
| GOBP_MATURATION_OF_SSU_RRNA                                                                | 1.72  | 0.002       | 0.017     |
| GOBP_TRNA_METHYLATION                                                                      | 1.71  | 0.002       | 0.021     |
| GOBP_REGULATION_OF_MRNA_SPLICING_VIA_SPLICEOSOME                                           | 1.71  | 0           | 0.021     |
| GOBP_POSITIVE_REGULATION_OF_TELOMERE_MAINTENANCE_VIA_TELOMERE_LENGTHENING                  | 1.71  | 0.004       | 0.021     |
| GOBP_SPLICEOSOMAL_COMPLEX_ASSEMBLY                                                         | 1.71  | 0           | 0.021     |
| GOBP_ALTERNATIVE_MRNA_SPLICING_VIA_SPLICEOSOME                                             | 1.7   | 0.006       | 0.023     |
| GOBP_RNA_5_END_PROCESSING                                                                  | 1.7   | 0.001       | 0.023     |
| GOBP_T_HELPER_17_CELL_DIFFERENTIATION                                                      | 1.68  | 0.004       | 0.031     |
| GOBP_POSITIVE_REGULATION_OF_MRNA_METABOLIC_PROCESS                                         | 1.68  | 0           | 0.033     |
| GOBP_NEGATIVE_REGULATION_OF_ADAPTIVE_IMMUNE_RESPONSE                                       | 1.67  | 0.002       | 0.041     |
| GOBP_DNA_TEMPLATED_DNA_REPLICATION                                                         | 1.67  | 0           | 0.041     |
| GOBP_MRNA_MODIFICATION                                                                     | 1.66  | 0.005       | 0.042     |
| GOBP_POSITIVE_REGULATION_OF_TRANSCRIPTION_BY_RNA_POLYMERASE_III                            | 1.66  | 0.002       | 0.041     |
| GOBP_POSITIVE_REGULATION_OF_RNA_SPLICING                                                   | 1.66  | 0.007       | 0.042     |
| GOBP_CD4_POSITIVE_OR_CD8_POSITIVE_ALPHA_BETA_T_CELL_LINEAGE_COMMITMENT                     | 1.66  | 0.002       | 0.045     |
| GOBP_NEGATIVE_REGULATION_OF_SIGNALING_RECEPTOR_ACTIVITY                                    | 1.64  | 0.004       | 0.057     |
| GOBP_MATURATION_OF_SSU_RRNA_FROM_TRICISTRONIC_RRNA_TRANSCRIPT_SSU_RRNA_5_8S_RRNA_LSU_RRNA  | 1.64  | 0.002       | 0.057     |
| GOBP_RRNA_METHYLATION                                                                      | 1.64  | 0.004       | 0.059     |
| GOBP_POSITIVE_REGULATION_OF_TELOMERASE_ACTIVITY                                            | 1.64  | 0.005       | 0.059     |
| GOBP_RNA_CAPPING                                                                           | 1.63  | 0.006       | 0.06      |
| GOBP_CLEAVAGE_INVOLVED_IN_RRNA_PROCESSING                                                  | 1.63  | 0.005       | 0.061     |
| GOBP_TELOMERASE_RNA_LOCALIZATION                                                           | 1.63  | 0.008       | 0.061     |
| GOBP_POSITIVE_REGULATION_OF_TYROSINE_PHOSPHORYLATION_OF_STAT_PROTEIN                       | 1.63  | 0.005       | 0.063     |
| GOBP_REGULATION_OF_RRNA_PROCESSING                                                         | 1.62  | 0.004       | 0.066     |
| GOBP_TRANSCRIPTION_BY_RNA_POLYMERASE_I                                                     | 1.62  | 0.014       | 0.071     |
| GOBP_MATURATION_OF_LSU_RRNA                                                                | 1.62  | 0.005       | 0.07      |
| GOBP_CHRONIC_INFLAMMATORY_RESPONSE                                                         | 1.62  | 0.001       | 0.069     |
| GOBP_NEGATIVE_REGULATION_OF_CYTOKINE_PRODUCTION_INVOLVED_IN_IMMUNE_RESPONSE                | 1.62  | 0.014       | 0.068     |
| GOBP_TELOMERE_MAINTENANCE_IN_RESPONSE_TO_DNA_DAMAGE                                        | 1.62  | 0.013       | 0.067     |
| GOBP_TRANSLATIONAL_TERMINATION                                                             | 1.62  | 0.004       | 0.066     |
| GOBP_MATURATION_OF_5_8S_RRNA_FROM_TRICISTRONIC_RRNA_TRANSCRIPT_SSU_RRNA_5_8S_RRNA_LSU_RRNA | 1.61  | 0.011       | 0.071     |
| GOBP_REGULATION_OF_HUMORAL_IMMUNE_RESPONSE                                                 | 1.61  | 0.01        | 0.075     |
| GOBP_RESPONSE_TO_NICOTINE                                                                  | 1.6   | 0.015       | 0.077     |
| GOBP_GPI_ANCHOR_METABOLIC_PROCESS                                                          | 1.6   | 0.011       | 0.078     |
| GOBP_POSITIVE_REGULATION_OF_TRANSLATIONAL_INITIATION                                       | 1.6   | 0.007       | 0.078     |
| GOBP_RNA_PHOSPHODIESTER_BOND_HYDROLYSIS_EXONUCLEOLYTIC                                     | 1.6   | 0.015       | 0.077     |
| GOBP_IRON_SULFUR_CLUSTER_ASSEMBLY                                                          | 1.59  | 0.009       | 0.084     |
| GOBP_ISOTYPE_SWITCHING_TO_IGG_ISOTYPES                                                     | 1.59  | 0.006       | 0.093     |
| GOBP_NEGATIVE_REGULATION_OF_CD4_POSITIVE_ALPHA_BETA_T_CELL_ACTIVATION                      | 1.59  | 0.011       | 0.092     |
| GOBP_T_HELPER_CELL_LINEAGE_COMMITMENT                                                      | 1.59  | 0.006       | 0.092     |
| GOBP_MONOUBIQUITINATED_PROTEIN_DEUBIQUITINATION                                            | 1.58  | 0.017       | 0.091     |
| GOBP_MITOCHONDRIAL_RNA_PROCESSING                                                          | 1.58  | 0.015       | 0.093     |
| GOBP_DNA_TEMPLATED_DNA_REPLICATION_MAINTENANCE_OF_FIDELITY                                 | 1.58  | 0.011       | 0.093     |
| GOBP_REGULATION_OF_TELOMERE_MAINTENANCE_IN_RESPONSE_TO_DNA_DAMAGE                          | 1.58  | 0.013       | 0.093     |
| GOBP_RNA_3_END_PROCESSING                                                                  | 1.58  | 0           | 0.092     |
| GOBP_REGULATION_OF_T_HELPER_17_TYPE_IMMUNE_RESPONSE                                        | 1.58  | 0.012       | 0.095     |
| GOBP_REGULATION_OF_MITOCHONDRIAL_GENE_EXPRESSION                                           | 1.58  | 0.019       | 0.094     |
| GOBP_ENDONUCLEOLYTIC_CLEAVAGE_INVOLVED_IN_RRNA_PROCESSING                                  | 1.58  | 0.011       | 0.095     |
| GOBP_REGULATION_OF_MITOCHONDRIAL_TRANSLATION                                               | 1.57  | 0.013       | 0.097     |
| GOBP_ENDODERMAL_CELL_DIFFERENTIATION                                                       | -1.44 | 0           | 0.091     |
